# Supplementary material for: A review of the opportunities to support pollinator populations in South African cities
Source: PeerJ. 2022 Mar 11;10:e12788. doi: 10.7717/peerj.12788 (PMC8919850; doi:10.7717/peerj.12788)
Supplement: Supplemental Information 1 — Abstracts were scanned and summaries of findings were tabulated. Findings were classified according to pollinator response to the urban gradient as either positive, negative, neutral or mixed. A positive classification was made when diversity or abundance increased, negative when it decreased, mixed when pollinators both increased and decreased and neutral when studies analysed alternative explanatory variables which suggest mitigation and management measures. Where findings recorded alternative explanatory variables for observed patterns these were also tabulated in order that qualitative themes could be unpacked. [file peerj-10-12788-s001.xlsx]

## Sheet: Sheet1
																			20	21	115				17	6	9	28	46	9	30	12	14	2	33	1	11	3	1		3
Year	Author	Journal	Type of Paper	Number of cities included in study	City/ Study location	Country	Reg-ion	hymenoptera	diptera	lepidoptera	birds	Mammals	coleoptera	plant/ pollen	Hopliini	Bombus	Bombus Neg	Bombus pos	Positive	Negative	Mixed / Neutral	Urban gradient response	Taxa / indicator	Other influences	Native plants/ flowers	Temperature / phenology / seasonal shifts	Flower attractiveness	Flower abundance/ frequency / diversity / richness	Habitat Type / land use	Fragmentation	Traits / taxa	Management	Vegetation Structure	Development Age	Green space / connectivity / patch size	Sunlight	Exotic flowers	Spill-over	Household income	Key findings	Temp	compares agriculture	Diversity 0= decrease, 1=increase	Rare species	Common species	Richness	Abundance	Flower intensity	Trees
1997	Parker	Ecology	Research	1	Washington	USA	NOA	1	1	1											1	mixed	hymenoptera, diptera, lepidoptera	Native flower availability	1															- Prairie populations of exotic plants received lower visitation rates than urban populations.
2001	Dutra and Machado	Neotropical Entomology	Research		Brazil	Brazil	SCA	1	1	1								0	1			positive	hymenoptera, diptera, lepidoptera	Native flower availability, Temperature,	1	1														- Lower native species at the rural area than urban. - Temperature, lights RH and wind speed influenced foraging.	1		1
2001	Lee, Sodhi, Elmqvist	Journal of Applied Ecology	Research		nr Singapore	Maylasia	PASA	1													1	mixed	stingless bees	Temperature, Flower intensity		1		1												- Bee abundance greater in primary forests, but richness is greater in disturbed areas. - Distribution influenced by density of big trees, temperature and flowering intensity. - more stingless bees were found where trees were larger, ambient conditions more constant and flowering intesities lower.						1	0	0	1
2003	Chapman, Wang, Bourke	Molecular Ecology	Research		London	UK	EUR	1								1		1	1			positive	Bombus																	- high density of number of colonies in urban environment. - "We conclude that urban habitats support large bumble bee populations and are potentially valuable in terms of bumble bee conservation."			1				1
2004	Tommasi, Miro, Higo, Winston	Canadian Entomologist	Research	1	Vancouver	Canada	NOA	1													1	mixed	hymenoptera	Flower attractiveness, Flower Intensity,	1		1		1											wild bee abundance peaked late spring, honey bees at end of summer. - Community Gardens had highest abundance, wild areas highest diversity. - Wild areas dominated by 'weedy species" such as dandelions which had high visitation rates.			0				1
2004	Johnson	International Journal of Tropical Research Science	Review	0	South Africa	South Africa	SSA	1	1	1		1	1							1			hymenoptera, lepidoptera, rodents, hopliini, diptera	fragmentation						1										- Africa has a-typical pollinator mutualisms which challenge global conceptualisations. - Changes in land-use and urbanisation may be disrupting these mutualisms and need further study.
2005	Eremeeva and Sushchev	Russian Journal of Ecology	Research	1	Kemerova, Russia	Russia	RUNA	1		1						1	1				1	mixed	lepidopera, bombus	Pollution Use intensity																- Bumblebees are more sensitive to pollution and recreational intensity than butterflies are. - Rare species decrease with urban intensity and common species increase in abundance and mass. "A relatively large number of rare species in the areas adjoining the city is evidence for a high adaptive potential of both insect groups. Under conditions of controlled anthropogenic influence on urban ecosy…				0	1
2006	Kane, Minckley, Kervin, Roulston, Williams	Ecological Applications	Research	1	Tucson, Arizoa	USA	NOA	1													1	mixed	hymenoptera	Dietary breadth Trait dependent							1									- Response to urbanisation dependant on dietary breadth and nesting traits. Cavity nesting species are more abundant, whilst ground-nesting species decline. Ground nesting species are less common on smaller fragments. - NB to analyse urbanisation response according to guilds.
2006	Segal, Sapir, Carmel	Isreal Journal of Ecology and Evolution	Research		Isreal	Isreal	MENA							1			0			1		negative	Iridaceae pollen	Fragmentation						1										- Fragmentation can separate plants from their pollinators. - Suggest hand pollination, seed collection and transplanting of seedlings and adults to enhance seed production.
2007	Andersson, Barthel, Ahrne	Ecological Applications	Research	1	Stockholm, Sweden	Sweden	EUR	1		1											1	mixed	pollinators, seed disbursers and insectivors.	Management					1			1								- in comparing allotments, cemetaries and city parks, informal management systems associated with allotments rendered higher biodiversity due to sense of place, community and passion of managers. - proposes institutional partnerships.
2007	Pauw	Ecology	Research		Cape Floral Region	South Africa	SSA	1									0				1	negative	Oil collecting bee	Trait dependent, Fragmentation, Size of fragment											1					- Generalist pollinators are important for specialist plant species. - Specialist plants on small urban fragments >365 Ha where there are declines in certain pollinator species due to anthropogenic drivers do not manage seed set.
2007	Culley, Spita, Wick	Anals of Botany	Research	1	Ohio	USA	NOA							1							1	neutral	V. pubescence	Fragmentation, Pollination systems						1										- urban fragmentation does not appear to impede gene flow in this species in urban context. - pollination systems must be considered when predicting impacts of fragmentation.
2007	Arizmendi, Constanza, Lourdes, Ivonne, Edgar	Biological Conservation	Research	1	Mexico City	Mexico	SCA	1			1										1	neutral	birds, hymenoptera	visitation								1								- plants near bird-feeders had lower visitation and seed set rates.
2007	Winfree, Grizwold, Kremen	Conservation Biology	Research	1	New Jersey	USA	NOA	1													1	mixed	hymenoptera	Tree canopy									1							- hymenoptera abundance and richness decreased with increasing forest area and tree canopy. - abundance was higher in agricultural, urban and suburban contexts than in extensive forests. - 18 species were positively correlated with extensive forests, one endemic, narrow specialist		1	1						0
2008	Fetridge, Ascher, Langellotto	Annals of the Entomological Society of America	Research	1	New York	USA	NOA	1													1	mixed	hymentoptera	Trait							1									- Surveyed gardens in a suburb. Compared with 1520 Ha research preserve. - bee community was not depauperate in either soil-nesting or parasitic communities. - specialist (oligolectic) and forest-dwelling species were absent. - suburban neighbourhoods in North America can host relatively intact hymenoptera communities.			1	0	1
2009	Kearns, Oliveras	Journal of Insect Conservation	Research	1	Colorado	USA	NOA	1													1	neutral	hymenoptera	Flower Intensity				1												- The differences in species composition across 3 levels of urbanisation was due to rare species. - Neither number of species nor abundance varied significantly between plots. - Bee abundance was positively correlated with flowering species abundance. - Factors other than urban intensity can play a role in insect diversity.				0				1
2009	Carre et al.	Agriculture, Ecosystems and Environments	Research	3	France, Poland, UK		EUR	1													1	mixed	hymenoptera	Trait dependent							1									- Some bee taxa positively affected by the presence of urban environments only. - Some bee taxa are positively affected by semi-natural habitats. - Some bee taxa are positively affected by crop habitats. - Some bee taxa are positively affected by a mix of urban, semi-natural and crop habitats. - The intensification of agro-ecological systems defined as the loss of semi-natural landscapes, does no…		1
2009	Frankie et al.	California Agriculture	Research	7	California State	USA	NOA	1													1	mixed	hymenoptera	Flower attractiveness			1		1											- bees are in decline globally - Residential gardens provide floral and nesting resources for bees. - Habitat gardening for bees, using targeted ornamental plants, can predictably increase bee diversity and abundance, and provide clear pollination benefits.
2009	Arhne, Bengtsson, Elmqvist	PLoS ONE	Research	1	Stockholm, Sweden	Sweden	EUR	1									0			1		negative	hymenoptera	Management, Flower intensity				1					1							- bombos sp. Decrease with increaseing urban intensity in allotment gardens. - abundance and diversity were most affected by management practices and local floral abundance. - There was high variability in the most urban sites.			0
2009	Andrieu, Dornier, Rouifed, Schatz, Cheptou	Acta Oecologica	Research		France	France	EUR	1									0			1		negative																		- urban populations had longer search durations, longer visitation duration and lower visitation frequency.
2009	Basteri, Benvenuti	Acta Horticulturae	Research		Pisa, Italy	Europe	EUR	1	1	1						1	1				1	mixed	hymenoptera, bombus, diptera, lepidoptera								1									- butterflies and bumblebee species are limited by urban ecosystems. - diptera and solitary bees were stable despite urban ecosystems.
2010	Sattler, Duelli, Obrist, Arlettaz, Moretti	Landscape Ecology	Research	3	Switzerland	Switzerland	EUR														1	neutral	arthropods	fragmentation										1						- little variation in species richness along gradients. - older neighbourhoods had higher diversity. - suggests pre-selection of species that are tolerant of fragmentation.
2010	Lomov, Keith, Hochuli,	Landscape and Urban Planning	Research	1	Sydney	Australia	PASA	1													1	neutral	hymenoptera	Dominant plants	1															- introduction of dominant plant species can foster a rapid return of their pollinators. The interactions between the plants and their native pollinators were resilient to pervasive exotic A. mellifera, and plants in restored ecosystems had an adequate reproductive output.
2010	van Rossum, Triest	Landscape and Urban Planning	Research	1	Brussels	Belgium	EUR							1							1	neutral		Flower Intensity, Connectivity				1							1					- Pollen flows travel further with higher connectivity and floral abundance. - small flower patches still exchange pollen with surrounding areas indicating that small patches are useful.
2010	Matteson, Langellotto,	Urban Ecosystems	Research	1	New York	USA	NOA	1		1							0				1	negative	hymenoptera, lepidoptera	Flower intensity, Sunlight, patch size, Tree canopy, Native plants				1												- Access to sunlight and floral abundance at local site level had a greatest impact on pollinator richness. - number of building units within 500m radius had a slightly less sigficant negative impact. - bee richness was supported by total garden area, canopy cover and presence of wild/unmanaged area.
2010	Stelzer, Chittka, Carlton, Ings,	PLoS ONE	Research	1	Britain	UK	EUR	1										0			1	positive	hymenoptera	exotic visitation													1			- B. terrestris in the UK are now able to utilise a rich winter foraging resource in urban parks and gardens that might at present still be under-exploited, opening up the possibility of further changes in pollinator phenology - The bumblebees were radio-tagged.
2010	van Rossum,	Perspectives in Plant Ecology, Evolution and Systematics	Research	1	Brussels	Belgium	EUR							1							1	neutral	pollen trails	Management, Flower intensity								1			1					The study compared urban parks with natural fragments and urban environments for pollenation exchanges. urban populations do not perform worse in reproductive success than populations from agricultural landscapes, despite their small size, and can function as a network exchanging pollen. The conversion of urban park lawns into interconnected networks of ecologically managed hay meadows, allowing …		1
2011	Sattler, Obrist, Duelli, Moretti	Landscape and Urban Planning	Research	1	Switzerland	Switzerland	EUR														1	mixed	arthropods	trait					1											- urban, agricultural and forest ecosystems harbour distinct species communities. - urban and agricultural ecosystems shared 30% of species. - 13% of all species were found predominantly in urban ecosystems.		1
2011	Tonietto, Fant, Ascher, Ellis, Larkin	Landscape and Urban Planning	Research	1	Chicago	USA	NOA	1													1	mixed	hymenoptera	Green space, Flower intensity				1	1						1					- Green-roof and prairie bee communities were distinct from each other, while those in parks were intermediate and similar to the other two habitat types. - Bee presence positively correlated with green space in surrounding landscape, except when dominated by turf-grass. - bees benefit from greater plant diversity at the site scale.
2011	Bates et al.	PLoS ONE	Research		UK	UK	EUR	1	1												1	mixed	hymenoptera, diptera	habitat					1		1									- bees and hoverflies are negatively affected by urbanisation. - some species positively associated with urban and suburban landscapes, but most negatively. - assemblages are positively associated with good quality local habitat.
2011	Hennig and Ghazoul	Perspectives in Plant Ecology, Evolution and Systematics	Research	1	Zurich	Switzerland	EUR	1													1	mixed	hymenoptera	Green space, Flower intensity											1					- Increasing floral abundance and plant diversity reduced pollinator visitation to T. pratense, suggesting competitive effects through both quantity and diversity of resources. - visitation by dominant species increased with available green space within 200m whilst other species decreased.
2011	Matteson, Langellotto,	Insect Conservation and Diversity	Research	1	New York	USA	NOA	1		1											1	mixed	hymenoptera, lepidoptera	exotic visitation													1			- Small scale additions of native plants fail to increase beneficial insect richness in urban gardens - Bayesian analyses failed to find a strong influence of native plant additions on beneficial insect richness, - butterflies and megachilid (leaf-cutter) bees were found to heavily utilise introduced ornamental and crop flowers in gardens, even when native flowers were present.
2012	Deguines, Julliard, de Flores, Fontaine	PLoS ONE	Research		France (countrywide)	France	EUR	1		1			1		0						1	mixed	hymenoptera, lepidoptera, diptera, coleoptera	trait					1		1									- affinities with urban, agricultural and natural landscapes differs between different pollinator orders. - hymenoptera were tolerant to most land-cover types. - all other orders showed affinity with agricultural and natural landscapes, but not with urban landscapes. - hymenoptera and coleoptera had frequent visitors of specialists in all land types. - diptera and lepidoptera contained specialist…		1
2012	Wojcik, McBride	Urban Ecosystems	Research	1	Halifax, Nova Scotia	Canada	NOA	1								1					1	mixed	Bombus, Halictidae	patch size, connectivity, spill-over							1				1					- Resource patch size and density consistently correlated with increased bee presence for all bee types foraging in the wildland. - larger bodied-bees (Bombus vosnesenskii and Megachile species) correlated significantly with resource patch size and density - smaller-bodied bees (family Halictidae and Andrena species) were influenced by landscape characteristics such as distance to the wildland-ur…
2012	Cranmer, McCollin, Ollerton	Oikos	Research	1	Northamptonshire	UK	EUR	1								1					1	neutral	Bombus	Connectivity											1					- linear structures such as hedgerows can alter and orientate bumblebee flight paths to green corridors. - plants had increased pollinator activity, pollen receipt and subsequent seed set in patches with more connections.
2012	Verboven, Brys, Hermy,	Landscape and Urban Planning	Research	1	Belgium	Belgium	EUR														1	neutral																		- no impact of urbanization intensity on pollinator diversity at all locations studied, and - the number of flower visits did not differ significantly between urban and rural populations.
2012	Hennig and Ghazoul	Urban Ecosystems	Research	1	Zurich	Switzerland	EUR	1	1												1	mixed	hymenoptera, diptera	flower intensity, Green space				1							1					- landscape influences for bee presence spanned 200m radius, but peaked at 80m for hoverflies. - plant diversity and floral abundance in urban environments promote pollinating flower visitors. - The extent of green area and edge density are important urban mosaic attributes that affect pollinator abundance and visitation frequency at multiple scales.
2012	Wojcik	Urban Habitats	Research		Costa Rica	Costa Rica	SCA	1													1	mixed		flower intensity				1												- only the total number of flowers at a food resource had a significant impact on bee occurrence, with resources that possessed more flowers attracting more bees and more bee types - Cities within the same region had similar bee compositions.
2012	Geerts, Pauw	South African Journal of Botany	Research		South Africa	South Africa	SSA				1										1	mixed		fragmentation						1										- The absence of a specialized bird pollinator (long-billed malachite sunbird) in urban fragments places the mutualist endangered flower at risk of extirpation from the fragments where they occur.
2012	Pauw, Louw	Ecology and Society	Research		South Africa	South Africa	SSA				1										1	mixed									1									- long-billed malachite subirds venture up to 1km into the urban fabric. - double breasted sunbirds are found throughout the city. - orange breasted sunbirds and sugarbirds appear to be urban avoiders as there is a lack of data on their presence in the city.
2012	Banaszak-Cibicka, Żmihorski	Journal of Insect Conservation	Research		Poland	Poland	EUR	1													1	neutral		Trait					1		1									- Species turnover occurs between the urban centre and the suburbs. - some specific ecological traits facilitate colonization of the city centre. - Small-bodied species that start their activity later in the season and are not solitary preferred the city centre. - bee species diversity and richness remained stable across the urban gradient indicating some advantages of being a city dwelling bee
2013	Ferreira, Martins, Dutra, Mentone, Antonini	Neotropical Entomology	Research		Sau Paulo	Brazil	SCA	1													1	neutral		Native habitat									1							Old Fragments of Forest Inside an Urban Area Are Able to Keep Orchid Bee (Hymenoptera: Apidae: Euglossini) Assemblages
2013	Antonini, Martins, Aguiar, Loyola	Urban Ecosystems	Research		SE Brazil	Brazil	SCA	1													1	neutral		Quality green space, Connectivity, Spill-over									1	1	1					the quality of the habitat within a fragment (structure of vegetation) as well as the quality of the matrix has a direct relation to the bee species composition. This can be seen in the direct relationship between structural diversity of the environment and age of the fragments. The matrix that holds the most recent fragments, probably due to the sprawl of the city, is more heterogeneous than the…
2013	Geslin, Gauzens, Thébault, Dajoz	PLoS ONE	Research			France	EUR										0				1	negative		trait					1		1									Along an urbanisation gradient comprising four types of landscape contexts (semi-natural, agricultural, suburban, urban), we set up experimental plant communities containing two plant functional groups differing in their morphological traits ("open flowers" and "tubular flowers"). Insect visitations on these communities were recorded to build plant-pollinator networks. - the number of interaction…		1
2013	Jha, Kremen	Molecular Ecology	Research		California	USA	NOA	1									0				1	negative																		- B. vosnesenskii gene flow is most limited by commercial, industrial and transportation-related impervious cover. - regional gene flow is limited by urbanisation.
2013	Williams, Winfree	Biological Conservation	Research				NOA														1	neutral		patch size											1	1				- Pollinator presence in woodland fragments were unaffected by urbanization. - Local habitat characteristics such as patch brightness and size determined visitation rates.
2013	Martins, Goncalves, Melo	Zoologia	Longitudinal		Brazil	Brazil	SCA	1													1	mixed		habitat							1									- longitudinal declines in a grassland habitat pollinators are attributed to urbanisation. - visitation rates to ruderal species increased in frequency. - minor increase in oligolectic species. - 50% reduction in larger bee species.
2013	Neame, Griswold, Elle	Insect Conservation and Diversity	Research		British Columbia, Canada	British Columbia, Canada	NOA	1													1	mixed		Site area							1				1					- overall species richness did not increase with fragment size. However, ground-nester abundance (not diversity) and cavity-nester diversity (not abundance) were higher in larger fragments, as expected - Responses of different nesting guilds to fragmentation may be related to their use of the landscape surrounding habitat fragments. Some common cavity nesters can nest in fences and gardens, but u…
2014	Neil, Wu, Bang, Faeth	Ecological Processes	Research		Phoenix	USA	NOA							1							1	mixed							1											- Water availability did not produce significant differences in flowering phenology, but irrigated urban sites bloomed later, longer and at higher percentage than those in desert remnant sites. - Desert remnant sites were lower in pollinator abundance than desert fringe sites.
2014	Pellegrino, Bellusci	Botanical Journal of Linnean Society	Research		Mediterranean	Italy	EUR							1			0				1	negative																		- small anthropic (urban) orchidaceae populations have lower viability compared with large natural populations.
2014	Pereira-peixoto, Pufal, Martins, Klein	Journal of Insect conservation	Research		Switzerland	Switzerland	EUR	1													1	neutral	bees and wasps	Spill over					1									1		hymenoptera benefit from gardens next to rape-seed fields becPASAe the fields provide forraging whilst the gardens provide nesting sites.
2014	Crowther, Hein, Bourke	PLoS ONE	Research		UK	UK	EUR	1								1		1			1	mixed	Bombus						1											- 250m landscape influences were the best fitting scale. - positively associated with urban and woodland cover. - negatively associated with oilseed rape cover. - B. hypnorum is associated with urban and woodland landscape elements. This species uses habitats that native bombus species do not.
2014	Fortel et al.	PLoS ONE	Research		France	France	EUR	1									0				1	negative		Suburban							1									- abundance of wild bees negatively correlates with proportion of impervious survace. - bee richness is at it's maximum at 50% coverage. - More parasitic wasps present at intermediate sites.
2014	Verboven, Aertsen, Brys, Hermy	Perspectives in Plant Ecology, Evolution and Systematics	Research	1	Leuven, Belgium	Belgium	EUR	1										0	1			positive		flower intensity, Green space				1							1					2 variables explain visitation rates: 1. Quantity of green areas (gardens, parks, grasslands) in the surroundings 2. extent of flower patches. Visitation rates increased with urbanisation.
2014	Bates et al.	PLoS ONE	Research		Britain	UK	EUR			1							0			1		negative		trait					1		1									Associations with habitat and landscape composition were species-specific, but there were consistent trends in species richness and total moth abundance. - Gardens with more diverse and extensive microhabitats were associated with higher species richness and moth abundance. - Gardens near the coast were associated with higher richness and moth abundance. - Gardens in more urbanized locations were…
2014	Leong, Kremen, Roderick	PLoS ONE	Research	1	San Francisco Bay	USA	NOA	1									0			1		negative																		- higher visitation rates in urban and agricultural areas do not result in higher seed set rates.		1
2014	Verboven, Uyttenbroeck, Brys, Hermy	Landscape and Urban Planning	Research	1	Flanders, Belgium	Flanders, Belgium	EUR	1	1								0			1		negative							1		1									- Abundance and diversity were highest for both hymenoptera and diptera in rural-natural sites when compared with urban areas and rural-agricultural sites. - when comparing agricultural and urban sites, bees favoured urban sites and hoverflies favoured agricultural sites.
2014	Wray, Elle	Landscape Ecology	Research		Victoria, Oak Savanna	USA	NOA	1						1				0	1			positive															1			- Urban and urban matrix sites supported high abundance and richness of plants and pollinators relative to other fragment categories. - Late-flowering resources in urban sites support late-season species and are supplemented by floral resources in the urban matrix.
2014	Larson, Kesheimer, Potter	Journal of Insect Conservation	Research		Kentucky, USA	USA	NOA	1	1								0			1		negative						1												- A mellifera more abundant and Bombus less with increasing percentage of hardscape . - Lawn weeds (taraxacum officianle and T. repens) can support declining species.
2014	Lhotte, Affre, Saatkamp	Flora: Morphology, Distribution, Functional Ecology of Plants	Research		France	France	EUR										0			1		negative																		Diversity of pollinators is lower in urban sites.
2014	Gunnarsson, Federsel	Journal of Insect Conservation	Research		Gothenburg, Sweden	Sweden	EUR	1								1		1			1	neutral	Bombus, hymenoptera	flower intensity, site area				1							1					- species richness higher in gardens than in flower beds. - bombus abundance affected by site size. - high flowering frequency positively affected total number of hymenoptera individuals at the sites
2014	Lowenstein, Matteson, Xiao, Silva, Minor	Biodiversity and Conservation	Research		Chicago	USA	NOA	1													1	neutral		flower attractiveness				1												- In more densely populated neighbourhoods. Bee communities shifted to a suite of species that carry more pollen and are more active pollinators in the system. - There was also a greater diversity of flowering plants.
2015	Cane	Apidologie	Research		France	France	EUR	1													1										1									- ground-nesting Halictus rubicundus, prefers nesting amid pebbles than bare dirt.
2015	Phillips et al	Botanical Journal of Linnean Society	Research				EUR	1						1						1				fragmentation						1										- Specialized pollination systems can threaten plant reproduction in a fragmented landscape where pollinators are rare.
2015	Hulsmann, Wehrden, Klein, Leonhardt	Apidologie	Research		Germany	Germany	EUR	1								1					1	neutral	Bombus	flower intensity				1												- Plant species diversity and abundance are more important than the amount of concrete in driving the abundance and species richness of common bumblebees. - Plant species composition also played an important role.
2015	Salisbury et al.	Journal of Applied Ecology	Research		Surry	UK	EUR	1													1	neutral		flower intensity, native flowers	1			1												- regardless of native, near-native and exotic border plants, greater floral resources resulted in an increase in visits. - greater abundance of total pollinators recorded on native and near-native treatments.
2015	Threlfall et al	Biological Conservation	Research		Australia	Australia	PASA	1													1	neutral		quality habitat	1			1	1											- Greater abundance and richness of bee species in public parks compared to golf courses and residential neighbourhoods. - Residential gardens were dominated by apis mellifera. - Ground-nesting species occurred more frequently in older golf courses and public parks surrounded by low impervious surface cover and with a low diversity of flowering plants. - Cavity nesting, floral spcialists within C…
2015	Sirohi, Jackson, Edwards, Ollerton	Journal of Insect Conservation	Research		Britain	Britain	EUR	1										0	1			positive	solitary & eusocial bees						1											- The urban core of the town was more diverse and abundant in solitary and primitively eusocial bees compared to meadows and nature reserves.
2015	Garbuzov, Schurch, Ratnieks	Urban Ecosystems	Research		Brighton	UK	EUR	1										0	1			positive							1											- Urban bees do not travel as far as rural bees to access high-quality foraging opportunities.
2015	Baldock et al.	Proceedings of the Royal Society B: Biological Science	Research		Britain	Britain	EUR	1	1												1	neutral		plant richness				1	1											- Urban pollinator assemblages were more homogeneous across space than those in farmland or nature reserves, - there was no significant difference in the numbers of rarer species between the three landscapes. - Urban visitors foraged from a greater number of plant species (higher generality). - Urban visitors foraged a lower proportion of available plant species (Higher specialization)... both po…
2015	Harrison, Winfree	Functional Ecology	Review				ALL														1	mixed
2015	Philips, Gardiner	PeerJ	Review				ALL	1													1	Mixed						1												- in pumpkin dominated agricultural landscapes, the addition of floral strips or field buffer strips did not have an effect on foraging activity of bees of pollen deposition. - However, semi-natural and urban habitats in surrounding landscape were positively correlated with the frequency of flower visitation by wild pollinators and the amount of pollen deposited.
2015	Sponsler, Johnson	PeerJ	Research		Ohio	USA	NOA	1									0				1	negative	A. mellifera						1											Colony food accumulation and wax production were positively related to cropland and negatively related to forest grassland. Colony food accumulation was negatively correlated with urban land cover and sites dominated by urban and agricultural land use.
2015	Garbuzov, Fensome, Ratnieks	Insect Conservation and Diversity	Research		UK	UK	EUR	1	1	1											1	neutral										1								- Reduced mowing intensity increases pollinator visiting rates and does not reduce public perception of the in more than 10% of individuals.
2015	Garbuzov, Ratnieks	Environmental Entomology	Research		UK	UK	EUR	1	1												1	neutral					1													None of the floral traits or attirubtes relevant to gardening correlate significantly with attractiveness to insects.
2016	Banaszak-Cibicka, Ratyńska, Dylewski,	Urban Forest and urban greening	Research		Poznan, Poland	Poland	EUR	1													1	neutral						1							1					- the distance of a bee community from a large green space with direct connection to suburban areas is the decisive factor for bee species richness in a city. - Density of bees was determined by host plant cover.
2016	Sikora, Micholap, Kelm	Journl of Apicultural Science	Research		Poland	Poland	EUR	1								1		1			1	neutral	Bombus				1													- in a botanical garden containing over 1000 flower species of plants, bumblebees visited 185 plants. 57 of which were deemed very attractive and were deemed indicators of bumblebee species. - 11 plant species were visited by at least 4 species of bumblebees.
2016	Matias, Maruyama, Consolaro	Plant Systematics and Evolution	Research				SCA				1						0			1		negative	hummingbird				1			1										- Birds favour areas with higher nectar load. - Fragmentation favours generalist species.
2016	Buckley, Nabhan	Natural Areas Journal	Research			USA	NOA	1		1	1	1		1			0			1		negative	bees, butterflies, birds, bats									1			1					- peak flowering is occuring 3-5 weeks earlier than a century ago leaving phenological gaps in nectar resources for certain pollinators. - ecological restoration of nectar corridors needs to be based on water resilience and building social capital from the bottom up.
2016	Theodorou et al.	Procedings of the Roal Society B: Biolobical Sciences	Research			Germany	EUR	1										0	1			positive							1											- We found that pollinator habitat (i.e. availability of nesting resources for ground-nesting bees and local flower richness) was strongly related to flower visitation rates at the local scale and indirectly influenced plant pollination success. - At the landscape scale, pollination was positively related to urbanization, both directly and indirectly via elevated visitation rates. - urban environ…
2016	Leong, Ponisio, Kremen, Thorp, Roderick	Global Change Biology			California	USA	NOA	1													1	neutral						1				1								seasonal patterns of abundance and species richness in human-altered landscapes varied significantly less compared to natural habitats in which floral resources are relatively scarce in the dry summer months. These findings demonstrate that anthropogenic environmental changes in urban and agricultural systems, here mediated through changes in plant resources and water inputs, can alter the tempor…
2016	Fukase, Simons	Applied Ecology and Environmental Research			Canada	Canada	NOA	1													1	neutral			1															Visitation rates were positively correlated with area of garden dedicated to native plant species.
2016	Fischer, Eichfeld, Kowarik, Buchholz	PeerJ	Research		Berlin	Germany	EUR	1										0	1			positive							1			1	1							- only one bee species was negatively affected by urbanisation. - Grassland restoration positively affected bee species richness in urban environments. - Differently structured and managed greenspaces in large-scale housing areas can provide additional foraging habitats and refuges for pollinators.
2017	Langellotto	Acta Horticulturae	Review			USA	NOA	1													1	mixed																		Gardens have fewer spring-flying bees and fewer soil nesters compared to non-garden sites. There are several potential explanations for this pattern including less availability of spring-blooming trees and other plants in gardens, and lack of nest site availability for soil-nesting bees.
2017	Martins, Gonzales, Lechowica	Urban Ecosystems	Research		Montral	Canada	NOA	1										0	1			positive						1	1											-Bee species richness, abundance and functional diversity all increased with urbanization in both gardens and semi-natural areas. - Gardens and semi-natural areas support distinct communities with unique responses to urbanization. - Residential garden bees forage from a greater number but lower proportion of available plant species. - both habitats promote regional bee diversity.		1
2017	Desaegher, Nadot, Dajoz	Genetica			France	France	EUR							1				0	1			positive																		Visitation rates were greater to urban flowers than to rural ones.
2017	Micholap, Sikora, Kelm, Sikora	Urban Ecosystems	Research	1	Wroclaw, Poland	Poland	EUR	1								1		1			1	neutral	Bombus												1					- Urban Green Areas larger than 30 ha provided conditions for most diversified bumblebee communities. - Smaller sites play an important role as refuges and in providing connectivity.
2017	Narem, Meyer	Journal of Lepidopterists Society	Review		Minnesota	Minnesota	NOA			1											1	neutral			1															- Three native grasses act as hosts for juvenile lepidoptera species. Each hosted 11, 9, and 8, species respectively.
2017	Chowdhury, Hesselberg, Bohm, Islam, Aich	Oriental Insects	Research	1	Bangladesh, India	India	SEA			1											1	neutral											1		1					The establishment of green areas with complex structural vegetation will improve microclimatic conditions for butterflies, promoting healthier urban ecosystems,
2017	Aguirre-Gutierrez et al	Global Ecology and Biogeography	Longitudinal		Netherlands	Netherlands	EUR			1											1	mixed									1									- high species diversity does not equate with high functional diversity. - Integrative analysis of traits is required to analyse landscape impacts
2017	Johnson, Fetters, Ashman	new Phytologist	Review				NOA							1							1	neutral			1															- Wildflowers planting pallets that share pollinators with native species may have negative consequences for native populations.
2017	Moron et al.	Ecological Engineering	Research	1	Krakow, Poland	Poland	EUR			1											1	mixed										1	1		1					- Urban area cover negatively affected the richness of native plants species on levees. - Shrub cover decreased the richness and abundance of butterfly species. - High mowing intensity had a negative influence on abundance of both plants and butterflies. - Community dissimilarity of plants on levees was affected by spatial variables.
2017	Lucia, Telleria, Ramello, Abrahamovich	Agricultural and Forest Entomology	Research		Argentina	Argentina	SCA	1										0	1			positive	Carpenter bee					1									1			- nesting peak coincides with greatest blooming period of the surrounding flora. - Nest pollen was predominantly from ornamental plants. - This carpenter bee is a good candidate for being a managed pollinator
2017	Davis et al	Landscape and Urban Planning	Research	1	Chicago, Illinois	USA	NOA														1	neutral							1						1					- Pollination supply enhancement is best achieved by targeting landscape changes within a nearby radius (250 m) of urban farms. - To support pollination services in gardens (a smaller patch size), enhancements need to be implemented throughout the city
2017	Dorea, Santos, Laguiar, Martins	Sociobiology	Research		Jaoa Pessoa	Brazil	SCA	1													1	neutral	Centris flavifrons (oil and pollen)						1											- wastelands and natural areas are important for supporting bee populations in urban areas.
2017	Hamblin, Youngsteadt, Lopes-Urive, Frank	Biology Letters	Research	1	Raleigh, NC	Bioloa	NOA	1									0			1		negative				1														- critical thermal maxima (Ctmax, is a measure of heat tolerance) can be used to predict population responses to urban warming. - species with low Ctmax declined the most in responst to urban heat island effect - these groups may be most sensitive to climate change.
2017	Glaum, Simao, Vaidya, Fitch, Iulinao	Royal Society Open Science	Research		Michigan	Michigan	NOA	1								1	1			1		negative	Bombus																	- significant declines in Bombus abundance and diversity associated with urban development when measured on scales in-line with flight ability. - Declines driven by declines in females; males show no response to urbanization- due to differences in foraging patterns. Suggests reduced Bombus colony density in more urban areas.
2017	Makinson, Threlfall, Latty	Urban Ecosystems	Research	1	Sydney	Australia	PASA	1													1	neutral							1						1					- Environmental factors such as garden size and distance to remnant forests may not have a strong influence on native bee diversity and abundance in highly urbanized area.
2017	Theodorou et al.	Functional Ecology	Research		Germany	Germany	EUR	1										0	1			positive							1						1					- Local land use influenced plant and flying insect communities, - Flower richness and bee richness were higher in urban compared to agricultural areas. - urban flower visitors were more generalised and foraged from a higher number of plant species Urban bees visited a lower porportion of available flowering plants. The proportion of urban cover, flying insect abundance and bee richness were posi…		1
2017	Plascencia, Philpott	Bulletin of Entomological Research	Research		California	California	NOA	1													1	mixed						1							1					- abundance of bees was lower in sites with more urban land cover surrounding the gardens. - Honeybee abundance was higher in sites with patchy floral resources. Bee species richness and bee diversity was higher in sites with more clustered floral resources, but lower in sites with very high floral abundance.
2017	Hall et al	conservation Biology	Review				ALL											0	1			positive																		Research on urban insect pollination is changing views on the biological value and ecological importance of cities. The reviewers argue that pollinators put high-priority and high-impact urban conservation within reach.
2017	Dubois, Cheptou	Philosophical Transactions of the Royal Society B: Biolobical Sciences	Research		France	France	EUR							1							1	neutral	Crepis sancta							1										- fragmentation provides a better descriptor of trait variation than urbanization per se for dispersal traits. - Pollinator scarcity and an inhospitable matrix can be drivers of adaptation.
2017	Senapathi, Goddard, Kunin, Baldock	Functional Ecology	Review				ALL														1	neutral													1					- The negative effects of human-dominated landscapes can be ameliorated by proximity to semi-natural habitat and habitat corridors. - Increased heterogeneity and landscape configuration can play an important role in the maintenance of diverse pollinator communities. - lack of information in non-bee taxa. - Research is needed on the effectiveness of management interventions for pollinators		1
2017	Sheherazada, Yasman, Ppradana, Tsang	Raffles Bulletin of Zoology	Research		Indonesia	Indonesia	SEA					1									1	neutral	Fruit Bats										1							- Urban fruit bats influence plant community structure in remnant urban forests by pollination and seed dispersion.
2017	Normandin, Vereecken, Buddle, Fournier	PeerJ	Research	2	2 cities in Canada	Canada	NOA	1										0		1		positive							1											- Despite high community evenness, there was significant abundance of diverse species, including exotics. - Higher stability in the most urbanzised city. - Low nestedness of species assemblages at all sites. - community gardens harbour high levels of functional trait diversity.
2017	Lagucki, Burdine, McCluney	PeerJ	Research	1	Toledo, Ohio	USA	NOA	1	1	1			1				0			1		negative	flying arthropods								1		1							- community composition associated negatively with percent impervious surface. - hymenoptera, lepidoptera and Araneae were positively associated with distance to city centre. - Hemiptera, diptera and diptera were negatively associated with percent impervious surface. - positive associations with canopy cover and soil moisture modulate the urbanization effect.
2017	Garbuzov, Alton, Ratnieks	PeerJ	Research		UK	UK	EUR							1							1	mixed		Flower attractiveness			1													- most ornamental plants on sale in garden centres are unattractive to flower-visiting insects and a few are highly attractive. - A substantial number of poor varieties were recommended and the corrolerary was also true.
2018	Hoyle et al.	Landscape and Urban Planning	Research	1	Luton, UK	UK	EUR	1	1												1	mixed		Flower attractiveness					1								1			- People prefer colour diversity to species diversity. - Higher abundance of certain pollinator taxa was measured in low-species diversity meadows. - Late-flowering non-native species can prolong the attractiveness of meadows for people and availability of resources for pollinators.
2018	Mach, Potter	PLoS ONE	Research	1	Kentucky, Southern Ohio, USA	USA	NOA	1													1	neutral		Flower attractiveness													1			- Strong seasonal variation in bee activity on woody plants. - No particular preference for native vs non-native species. - Some non-native plants bloom when native plants were scarce and were highly bee-attractive.
2018	Koyama et al	Urban Ecosystems	Research	1	Tsukuba, Ibaraki Prefecture, Japan	Japan	PASA	1						1							1	neutral	Apis cerana	exotic visitation	1				1											- Apis cerana (native bee) collected the majority of it's pollen from native species (53%), but also from crop plants, garden trees, and native and non-native weeds. - In September- October, the main pollen source was a garden tree and non-native weed. - Native honeybees use plants from a variety of habitats including non-native plants to compensate for apparent seasonal shortages of native tree …
2018	Harrison, Gibbs, Winfree	Global Ecology and Biogeography	Research	3	New Jersey, New York and Pensilvania	USA	NOA										0				1	negative							1											- Forested, agricultural and urban landscapes did not differ detectably in either mean pairwise species dissimilarity or slope of distance-decay. - Dissimilarity among both agricultural and urban bee communities increased with geographic distance. - Urban bee communities are dominated by closely related species that maintain beta diversity at the species level, but contribute to low phylogenetic …		1
2018	Ferreira-Caliman, Rocha-Filho, Freiria, Garofalo	Grana	Research	1	Ribeirao Preto, Sao Paulo State, Brazil	Brazil	SCA	1													1	neutral	Euglossa cordata	exotic visitation	1												1			- Although bees visited non-native species for nectar, all pollen analysed was from native species only.
2018	Jachula, Konarska, Denisow	Protoplasma	Research	1	Lublin Upland, Poland	Poland	EUR	1	1					1			0				1	negative	Linaria vulgaris. Bpmbus, Apis	order					1		1									- Urban species of Linaria vulgaris were visited by Bombus terrestris and Apis mellifera, whilst the rural site included syrphid flies and wasps.
2018	Cardoso, Goncalves	Urban Ecosystems	Longitudinal	1	Curitiba	Argentina	SCA	1													1	mixed		trait							1									- Same method of sampling 1980 repeated 2015. - Bee species richness has declined by 45% (from 112 species to 63) - Two species are extirpated in the city. - Social bees and large bees that nest in cavities have increased relative to small bees that nest in the ground.
2018	Johansson, Koffman, Hedblom, Devoni, Andersson	Ecosphere	Research	1	Sollentuna, Stockholm, Sweden	Sweden	EUR	1									0				1	negative		barriers						1										- bees and wasps are sensitive to barriers (within 200m radius) such as large roads and built-up areas when foraging in urban environments.
2018	Kobayashi et al	Mammal Study	Research	2	Okinawa jima Island, Japan, and Taiwan	Japan	PASA					1									1	neutral							1				1							- Ryukyu flying foxes were the pollinator of M. macrocarpa in both urban and forested areas of Okinawa-jima Island. - Red-bellied squirrels were the main pollinator species in Taiwan. - both visited M. macrocarpa at the same frequencies in urban areas, but nectar-robbing only occured in forested areas.
2018	Bartual, Bocci, Marini, Moonen	PLoS ONE	Research	1	Pisa, Italy	Italy	EUR							1				0	1			positive	Sunflowers	spill-over, habitat					1				1					1		Sunflower seed set was higher in fields surrounded by landscapes containing greater abundance of beehives, early flowering crops, urban areas and woody linear elements. Seed set was lower where herbaceous semi-natural habitats dominated the surrounding landscape.		1
2018	Banaszak, Twerd, Raynska, Banaszak-Cibicka, Zys	Polish Journal of Entomology	Research	1	Bydgoszcz and Poznan, Poland	Bydgoszcz and Poznan, Poland	EUR	1										0	1			positive		invasive species													1			- the spread of an invasive plant into urban areas has enabled large and stable populations of a rare bee species.
2018	Candido, Morato, Storck-Tonon, Miranda, Vieira	Journal of Insect Conservation	Research	1	Rio Branco, Acre	Brazil	SCA	1										0	1			positive	Euglossini (orchid bees)	connectivity											1					- fragments with larger forest cover area and smaller built-up areas around them contribute to the maintenance and diversity of orchid bees.
2018	Merck, Kaiser, Van Dyck	Global Change Biology	Research	1	Belgium	Belgium	EUR														1	neutral		connectiity							1									- Macro moth body size increases along urbanization gradients. - Urbanization drives shifts towards larger, more mobile species and individuals to mitigate low connectivity of ecological resrouces.
2018	Choate, Hickman, Moretti	Journal of Insect Conservation	Research	1	Meadville, Pennsylvania	USA	NOA	1									0				1	negative		green space, flower intensity	1			1							1					- Bee species richness was greatest at sites with the largest amount of permeable surface and native vegetation. - Richness decreased at the city centre where landscapes were highly managed and impermeable surfaces were most abundant. - Number of open blooms near traps had a positive impact on bee species richness.
2018	Banaszak-Cibicka et al.	Urban Ecosystems	Research	1	Poznan, Poland	Poland	EUR	1													1	mixed		habitat, patch size, trait	1						1				1					- A large and diversified city park may be a favourable habitat for bees, comparable to the natural fauna both in terms of the number and abundance of bee species. - Different functional guilds were found in city parks to natural landscapes.
2018	Russell, Russell, Kaplan, Mian, Kornbluth	Biodiversity and Conservation	Research	1	Maryland, Baltimore	USA	NOA	1						1							1	neutral		management								1								- Alternative active vegetation management along powerlines increase in abundance and diversity of wild bees, including more social bees, parasitic species and across nesting guilds. - successful management included spot removal and herbicide treatment of unwanted species as opposed to episodic mowing.
2018	Simao, Matthijs, Perfecto	Journal of Applied Ecology	Research	1	Michigan	Michigan	NOA	1													1	neutral	halictid bees	flower intensity, connectivity				1												- small flower plantings can have positive effects on small bee communities in urban systems even over a short period of time
2018	Luder, Knop, Menz	Diversity and Distributions	Research	8	Switzerland	Switzerland	EUR		1												1	neutral	Hoverflies	trait		1			1											- There was no difference in species richness between urban and rural ecosystems. - The community structure of urban and rural ecosystems differed. - Migratory species appeared in Urban environments earlier in the year.
2018	Samuelson, Gill, Brown, Leadbeater	Proceedings of the Royal Society B: Biological Science	Research	3	London, Reading Basingstoke	UK	EUR	1								1		1	1			positive	Bombus																	- reared Bombus colonies placed in urban settings produced more sexual offspring, reached higher peak size, had more food stores, encountered fewer parasite invasions and survived for longer than those in agricultural land.
2018	Langelotto	Sustainability (Switzerland)	Research	1	Portland, USA	USA	NOA	1										0	1			positive		edge														1		- Urban food gardens might provision neighboring farms with pollination services and serve as a refuge for pollinators when forage or nest sites are scarce.
2018	Hamblin, Youngsteadt, Frank	Urban Ecosystems	Research	1	Raleigh, NC, USA	USA	NOA	1									0			1		negative		competition, urban warming, flower intensity		1		1												- Bee abundance declined by 41% per degree centigrade urban warming . - Local impervious surface and floral density were predictors of bee abundance. - Only large bees appear to benefit from high floral density.	1
2018	Coetzee, Barnard, Pauw	Journal of Avian Biology	Research	1	Cape Town, South Africa	South Africa	SSA				1						0			1		negative		habitat, plant attractiveness, patch size					1		1		1		1					- Habitat generalism and tree nesting were the most important biological traits influencing bird occurrence in gardens. - A greater diversity of indigenous bird-pollinated plants and the presence of sugar water feeders increased the number of nectar specialist birds and species richness of nectarivorous birds. - large vegetated areas facilitated urban adjustment and negatively associated with dis…
2018	Lerman, Contosta, Milam, Bang	Biological Conservation	Research	1	Massachussetts	USA	NOA	1													1	neutral		management								1								- lawns mowed every three weeks had as much as 2.5 times more lawn flowers than more frequent mowing. - Lawns mowed every two weeks repported the highest bee abundance and lowest bee richness and evenness.
2018	New	PASAtral Entomology	Review		Australia	Australia	PASA														1	neutral		connectivity, management	1							1			1					- Recognition that taxonomic and ecological diversity of insects can be high in urban areas. - Acknowledgement that insect diversity in urban environments is vulnerable to changes and a variety of threatening processes. - Mitigation responses that involve reducing threats, preserving open spaces with natural vegetation, creating new open areas, and promoting connectivity. - Estabishment of partne…
2018	Grafius, Corstanje, Harris	Landscape Ecology	Research		English Countryside	UK	EUR														1	neutral		patch size											1					- Larger patches up to 10 Ha in size store more carbon per area and support more pollinators but there is no added benefit with larger areas.
2018	Bode, Tong	Journal of Plant Ecology	Research	1	Olympia, Washington	USA	NOA	1						1							1	neutral					1													- larger scotch broom flowers were pollinated in urban environments compared to rural populations.
2018	Stewart, Sritongchuay, Teartisup, Kaewsomboon, Bumrungsri	PeerJ	Research	1	Bangkok, Thailand	Thailand	PASA														1	neutral		habitat, patch size				1	1						1					- 98% of individuals collected were bees. - Patch size and floral abundance had positive effects on pollinators. - Patterns were consistent in a variety of location types, but butterflies preferred parks.
2019	Buchholz, Kowarik	Scientific Reports	Research	1	Berlin, Germany	Germany	EUR														1	neutral		invasive species													1			- pollinators tended to hover in front of invasive species for longer before visiting, but the decision rate diminished with urbanization.
2019	Nakamura, Kudo	Urban Ecosystems	Research	1	Hokkaido, northern Japan,	Japan	PASA										0			1		negative		habitat, flower attractiveness			1		1											urban gardens are important foraging sites for pollinators, the high attractiveness of garden flowers reduces pollinator visits to wildflowers in nearby forests. This may result in reduced pollination of native flowers.
2019	Fitch et al.	Scientific Reports	Research		SE Michigan, USA	USA	NOA										0			1		negative		trait							1									-OSR became more male biased as urbanization increased, mainly driven by a decline in medium and large bodied ground-nesting female bees. Nest site preference and body size mediated the effects of urbanization on OSR.
2019	Dylewski, Mackowiac, Banaszak-Cibicka	Ecological Entomology	Research	1	Poznan, Poland	Ecoloa	EUR														1	mixed		habitat					1				1		1					The total abundance of pollinators was higher in urban grasslands than in housing estates and urban parks. Species composition of pollinator communities differed between the three habitat types. The study results showed that species richness and abundance of butterflies varied between habitat types (Urban Green Areas, urban grasslands, urban parks), whereas no such differences were found in the c…
2019	Sritongchuay, Hughes, Bumrungsri	Global Ecology and Conservation	Research		Thailand	Thailand	SEA					1									1	mixed	Bats						1											Nectarivorous bats showed higher levels of normalised degree, and strength than frugivorous bats. The normalised degree of frugivorous bats, but not nectarivorous bats increased with the proportion of urban area within 30 km radius. The strength of bats was positively correlated with the proportion of plantations within a 2 km radius. O
2019	Lucek et al.	Apidologie	Research	3	Bern, Basel, Zurich	Germany	EUR	1													1	neutral	Honeybees																	Even though land cover differed between urban and non-urban sites, plant diversity in the honey did not.
2019	Zhao, Sander, Hendrix	Urban Ecosystems	Research	1	Iowa City, IA	USA	NOA														1	mixed	inVEST landscape modeling	habitat, management					1				1							Incorporating high-thematic-resolution urban land-use data substantially improves the performance of pollination supply modeling. - Pollinator supply meets demand in 72% of the city for urban agriculture sites. - Surpluses occur in natural areas and heavily vegetated, established residential neighborhoods. - Defecits occur in resource-poor lawns. - Humans have a key role in modifying resource ava…		1
2019	Collado, Bartomeus	Diversity and Distributions	Longitudinal		North-eastern USA	USA	NOA	1									0			1		negative	apoidea.	habitat	1				1								1			- Longitudenial study (2001-2015) - Natural habitats sustain higher bee diversity and a different set of species to agricultural and urban areas. - Although many bee species use human - altered habitats, they exhibited strong preferences for natural habitats and only a few preferred altered habitats. - Landscape composition only has moderate buffer effects on diversity loss. - Loss of biodiversit…
2019	Yang et al	Landscape and Urban Planning	Research	1	Xi'an City, China	China	SEA							1							1	neutral		green space				1				1			1					- Plant species diversity in lawns was positively associated with proportion of green space around lawns and lawn age and negatively associated with frequency of use of chemical fertilizers. - Proportion of native plant species in lawns as negatively associated with frequent use of chemical fertilizers and mowing frequency and positively associated with irrigation and lawn size. - Pollinator spec…
2019	Harrison, Gibbs, Winfree	Landscape Ecology	Research		NE United States	USA	NOA	1									0				1	negative		traits					1		1									- Anthropogenic landscapes support fewer rare bee species. - half as many rare bee species in agricultural landscapes compared to forest, and half as many phenologically rare species in urban landscapes. - Bees that have both shorter flight seasons and smaller range sizes are between one-third and one-half as rich in both types of anthropogenic landscapes.
2019	Hung, Ascher, Davids, Holway	Ecology	Research	1	California	USA	NOA	1									0				1	negative	Bees	fragmentation						1	1									- Ecological filtering drives bee diversity loss in fragments, with a disproportionate loss in functional diversity relative to taxonomic diversity. - preferential extirpation of reserve-associated indicator species and disproportionate loss of range-restricted species. - No indication of taxonomic or functional homogenization across fragment bee assemblages, ie. filtering was not enough to cPASA…
2019	Lowenstein, Matteson, Minor	Urban Ecosystems	Research	1	Chicago	USA	NOA														1	neutral		Flower attractiveness	1		1										1			- In general, perennial and native plants receive more pollinator visits than their counterparts and ornamental plants are visited by more species than unintentional weeds. - a subset of highly attractive plants were visited by a disproportionate number of pollinators. - the two most highly visited plant taxa were non-native, perennial weeds. - Many flowering plants in cities are not visited by p…
2019	Baldock et al.	Nature Ecology and Evolution	Research			UK	EUR												1			postivie		gardens					1										1	- Residential gardens and allotments are pollinator hotspots: Gardens due to their extensive area and allotments due to their high pollinator diversity and leverage on city-scale plant-polinator community robustness. - Household income was positively associated with pollinator abundance
2019	Maruyama et al	Biological Conservation	Research	1	Brazil	Brazil	SCA				1										1	mixed	hummingbird								1									- urbanization affected hummingbird communities by promoting higher generalization and dominance by more aggressive hummingbirds. - Specialized long-billed hermits were absent in urban interaction network and at feeder stations from more urbanized areas. - Plant origin (native or exotic) did not matter. - ie. fewer rare/ specialized species.
2019	Bennet, Lovell	PLoS ONE	Research		Chicago	USA	NOA	1													1	mixed		trait							1									- Large-bodied bees, Bombus and Apis species were positively associated with increasing amounts of impervious cover, - The abundance of small-bodied, soil nesting, Halictus species increased as the porortion of flower area increased (local variable). - Bee richness declined with increasing levels of impervious cover. - Pollination services declined with increasing hardscape (local variable)			0					1
2019	Leve, Baudry, Bessa-Gomes	Science of the Total Environment	Research		France	France	EUR	1	1	1			1				0				1	negative		gardens					1											- pollinators are in close proximity to domestic gardens as locally favorable habitats that are embedded within a landscape, in which impervious surfaces represent unfavorable areas.
2019	Lewis et al.	Frontiers in Ecology and Evolution	Research		Chicago	USA	NOA						1					0	1			positive																		Cities matter for monarch butterflies, other pollinators and at-risk wildlife species.
2019	Wilson, Jamieson	PLoS ONE		1	Michigan	USA	NOA	1								1	1				1	mixed	Bombus, Lasioglossom	flower density				1			1									Urbanization positively affected bee diversity and evenness but had no effect on total abundance or species richness. - urbanization altered bee community composition via differential effect on bee species and functional groups - More urbanized sites supported a greater number of exotic, above-ground nesting and solitary bees, but fewer eusocial bees. - Blooming plant species richness positively …
2019	Ksiazek-Mikenas, Fant, Skogen,	Frontiers in Ecology and Evolution		1	Chicago	USA	NOA							1							1	neutral		connectivity											1					- green roofs are important stepping stones to providing connectivity in the urban matrix.
2019	Sánchez-Echeverría, Castellanos, Mendoza-Cuenca, LZuria, Sánchez-Rojas			1	Central Mexico	Mexico	SCA	1									0				1	negative		temperature		1														- urban bees have a lower temperature band tolerance with a higher Critical Thermal minimum (CTmin), but their CTmax did not differ. - body size did not differ between urban and rural populations.	1
2014	Bates et al.	PLoS ONE	Research		Britain	UK	EUR			1											1	mixed	195 moth species	habitat diversity					1		1									Associates with habitat and landscape composition were species-specific. - Gardens with more diverse and extensive microhabitats were associated with higher species richness and moth abundance; - Gardens near the coast were associated with higher richness and moth abundance - Gardens in more urbanized locations were associated with lower species richness and moth abundance. - Vulnerable species w…
2020	Marin, Martinez-Sanchez, Sagot, Navarrete, Morales	Basic and Applied Ecology	Research		San Cristobal de Las Casas	Mexico	SCA	1	1	1											1	neutral		spill-over	1				1											Natural areas harbor significantly more floral visitor species than home gardens. The differences in species composition between habitats and seasons highlight the need to view natural areas and home gardens as complementary habitats with which floral visitors interact in varying ways during successive seasons. - Home gardens showed higher abundance across seasons.
[truncated: 27 more columns]

## Sheet: By year
	Included	Returns
1996	0	1
1997	1	1
1998	0	0
1999	0	1
2000	0	0
2001	2	5
2002	0	0
2003	1	2
2004	2	3
2005	1	3
2006	2	6
2007	5	10
2008	1	9
2009	6	10
2010	6	12
2011	5	14		Number of papers matching search criteria by year, against the number included in this review										Percentage of papers matching the search criteria that met secondary inclusion criteria for inclusion in the study.
2012	9	15
2013	7	25
2014	15	30
2015	13	30
2016	8	24
2017	24	45
2018	27	53
2019	20	60
2020	1	1
	% included
1996	0
1997	1
1998	0
2001	0.4
2002	0
2003	0.5
2004	0.666667
2005	0.333333
2006	0.333333
2007	0.5
2008	0.111111
2009	0.6
2010	0.5
2011	0.357143
2012	0.6
2013	0.28
2014	0.5
2015	0.433333
2016	0.333333
2017	0.533333
2018	0.509434
2019	0.333333
2020	1

## Sheet: By Region
Region		Number of papers	% of total	Positive	Negative	Neutral / Mixed		Total Bombus studies	Bombus negative	Bombus positive	Diptera	Lepidoptera
EUR	Europe	63	0.42	12	6	46		9	1	6
NOA	North Americas	53	0.353333	4	10	39		3	2	0
SCA	South Central America	14	0.0933333	3	1	11		0	0	0
PASA	Pacific Asia and Australia	9	0.06	0	1	8		0	0	0
SSA	Sub-Saharan Africa	5	0.0333333	0	2	3		0	0	0
SEA	South East Asia	4	0.0266667	0	0	4		0	0	0
RUNA	Russia and North Asia	1	0.00666667	0	0	1		1	1	0
MENA	Middle East and North Africa	1	0.00666667	0	1	0		0	0	0
TOTAL	Total	150	1	19	21	112

## Sheet: By family
hymenoptera	104
diptera	16		All of which also discussed other species.
lepidoptera	18		Of which 3 discussed moths.
birds	7
Mammals	5
coleoptera	5
plant/ pollen	20
