# Supplementary material for: A review of the opportunities to support pollinator populations in South African cities
Source: PeerJ. 2022 Mar 11;10:e12788. doi: 10.7717/peerj.12788 (PMC8919850; doi:10.7717/peerj.12788)
Supplement: Supplemental Information 2 [file peerj-10-12788-s002.xlsx]

## Sheet: Sheet1
				hymenoptera	diptera	hopliini	Useful for
Kemp	2018	Namaqualand	Plant species are unevenly distributed across colour pattern categories (CPC), suggesting that certain CPCs have selective advantage. Clustering of CPCs in communities is more frequent than over-dispersion… in most communities at least one CPC is overrepresented. Each community has a single pollinator that strongly interacts with tje pverre[resemted CPC, suggesting a role for pollinator preferenc…	1	1	1	Discussion on species dominance, relationship with flower community.
Raguso	2019		Guilds of South African plants have evolved specialized relationships with long-tongued nemestrinid and tabanid flies thanks to geographic isolation and climatic stability.		1		How South Africa is different.
joubert-vdm, samways	2019	Grassland	Ecological networks composed of an interconnected system of conservation corridors… butterfly species richeness. Declined with increased dominance by a single plant species which occurs late in the disturbance cycle indicating that they benefit from natural fire disturbance (between thickets).
Vrdoljak, Samways, Simaika	2016	Hermon, Nr Wellington	Local scale flower density, diversity and community structure increase flower visiting insect activity to mixed floral stands and specific mass flowering plants had positive impacts despite their presence on sites with lower floral density and diversity. High quality habitat should be included as stepping stones for pollinators. The visitor pool was dominated by coleoptera and diptera... Coleopte…	1	1	1	Local patch dynamics.
Adedoja, Kehinde, Samways	2018	CFR	Insect zonation followed plant assemblages across an altitude gradient.
Simaika, Samways, Vrdoljak	2018	CFR	Plant turnover decreased with greater geographical distances between plot pairs, but insect turnover remained high with increasing geographical distance between flot pairs. Findings suggest that while patterns of plant diversity and distribution shape flower-vsiting insect assemblages, they are not reliable surrogates.
Melin & Colville	2019		Motivation for greater expertise in African Bees which are NB for their taxonomic diversity.
Melin, Colville, Duckworth, Altwegg	2020		Natural landscapes account for 12% of bee pollen collected. The rest was from human altered landscapes (alien and eucalyptus) despite access to natural landscapes.
Pardo and Borges	2020		Worldwide importance of insect pollination in Apple orchards…a review... A significant portion of studies showed that wild pollinators are frequently more effective in pollination services than honeybees… No studies from Africa.
Turpie, Forsythe, Knowles	2017		Total ecosystem service value provided by natural areas to the people of South Africa is R275 billion. Higher values correspond both to areas of higher biomass, which have higher capacity to supply ecosystem services, and areas of higher population densities, which generate demand as well as threats
Donaldson	2002		An attempt to document declines in pollinators. He does not go further than describing assumed and documented threats or outcomes of possibly caused by pollinator delclines, but he is only speculating! He does describe the biodiversity of South Africa "Michener (1979) ranked the warm temperate xeric areas of Australia, Chile and South Africa fourth (Out of 10 regions) in terms of relative bee abu…
Cupido and Nelson	2012		will roella ciliata persist? Monitoring of population in a residential nature reserve 30 km east of Cape Town. Generalized entomophilous pollination system, but floral visitors are scarce.
Avuletey & Niba	2014		Percentage herb cover, grazing intensity, distance to the city centre and average flower density accounted for species distribution patterns of lepidoptera. Butterflies requrie sufficient herb cover and nectaring plants durin gthe summer season.
Schmid et al	2015		response of nectarivorous bird species: Cape sugarbird (Promerops cafer) and orange-breasted sunbird Anthobaphes violacea The populations of the two bird species responded positively to the aount of sugar resources at the site scale. Focused on tall overstorey protea species ... High sugar density decreased per-plant visitation rates (i.e. plants competed for animal pollinators) indicating that t…
Donaldson, nanni et al	2002		The species richness of bees, flies , and butterflies did not vary significantly among different sized fragments. However the abundance of particular species of bees and monkey beetles was significantly affected by fragment size, together with factors such as vegetation cover and the ratio of grass to shrubs. Fragent size and distance to large remnants of vegetation had a signficant influence on …				Very important for phenology chapter.
Mawdsley, Harrison, Sithole	2016		plant-pollinator assemblage and food web analysis suggest that pollination services in the skukuza ranger district, kruger national park, may exhibit some resillience to environental perturbations.
Melin et al.	2014		Western cape deciduous fruit industry is worth R 9800 million per year… South african honey bees exhibit traits of resilience agaist varroa mite and American foulbrood. Coloy losses for beekepers using A. m. scuttellata have for the most part, been attributd to the A. m. capensis worder social parasite. Colony losses are increased by migratory beekeeping practices. The pollination deficit in Sout…
Rodger et al	2003		Too old
Godlblatt and Manning	2006		Seventeen distinct pollination ystmes are known for genera of the sub-Saharan African Iridaceae… long tongued bees are the strategy for most genera of the large subfamilie of Iridoidaea and Crocoidaea… also long-proboscid flies, large butterflies, night-flying moths, hopliine beetles and sunbirds. Bee pollination is divese... only about 2% of species use multiple pollinators and can be described …
Barraclough, Slotow	2020		Moegistorynchus longirostris has longest proboscis of all known insects and is a keystone species along the west coast, where it pollinates, the long-tubed flowers of at least 20 secies of Iridaceae, Geraniaceae and Orchidaceae. It is not a habitat specialist, but is critical in the North and Western Cape Coastal region. Proboscis length declined with and increase in degrees south
van Schalkwyk, Pryke, Samways	2019		Arthropod diversity in agricultural areas is influenced by land-use intensity at both local and landscape scales… Lower amounts of non-crop habitat was associated with higher in-field species… especially non-cultural predators and detritivores, for which higher levels of fertilization reduced in-field species richness... production systems with high border contrast and highly productive crop habi…
Coetzee, Barnard & Pauw	2018		Habitat generalism and tree nesting were identified as important biological traits influencing bird occurrence in gardens. A greater number of indigeous bird-pollinated plants and the presence of sugar water feeders incrased the numbers of nectar specialist birds and species richness of nectarivorous birds. Opportunisitc birds urban adjustment was facilitated by large vegetated areas in gardens a…
Simba et al	2018		Natural vegetation within mango plantations provide a positive impact on pollination services for mango crops.
Kehinde et al.	2018		Organic farming promotes bee abundance in vineyards in Italy, but not in South Africa. This may be because of the presence of monky beetles which are a dominant pollinator present in South Africa, but not Italy and their preference for pan traps. This emphasizes the necesity for local and region specific studies for informing conservation, as even in the same crop system with a similar climate, t…
